# Supplementary material for: Spatial and temporal heterogeneity of mouse and human microglia at single-cell resolution
Source: Springer Nature journal article supplement (doi:10.1038/s41586-019-0924-x), 2019-02-01
Supplement: 41586_2019_924_MOESM1_ESM.pdf [file 41586_2019_924_MOESM1_ESM.pdf]

# Spatial and temporal heterogeneity of mouse and human microglia at single-cell resolution

Takahiro Masuda<sup>1,17</sup>, Roman Sankowski<sup>1,2,17</sup>, Ori Staszewski<sup>1,17</sup>, Chotima Böttcher<sup>3</sup>, Lukas Amann<sup>1,4</sup>, Sagar<sup>6</sup>, Christian Scheiwe<sup>5</sup>, Stefan Nessler<sup>7</sup>, Patrik Kunz<sup>7</sup>, Geert van Loo<sup>8,9</sup>, Volker Arnd Coenen<sup>10</sup>, Peter Christoph Reinacher<sup>10</sup>, Anna Michel<sup>11</sup>, Ulrich Sure<sup>11</sup>, Ralf Gold<sup>12</sup>, Dominic Grün<sup>6</sup>, Josef Priller<sup>3,13,14</sup>, Christine Stadelmann<sup>7</sup> & Marco Prinz<sup>1,15,16\*</sup>

<sup>1</sup>Institute of Neuropathology, Medical Faculty, University of Freiburg, Freiburg, Germany. <sup>2</sup>Berta-Ottenstein-Programme for Clinician Scientists, Faculty of Medicine, University of Freiburg, Freiburg, Germany. <sup>3</sup>Department of Neuropsychiatry and Laboratory of Molecular Psychiatry, Charité – Universitätsmedizin Berlin, Berlin, Germany. <sup>4</sup>Faculty of Biology, University of Freiburg, Freiburg, Germany. <sup>5</sup>Clinic for Neurosurgery, Faculty of Medicine, University of Freiburg, Freiburg, Germany. <sup>6</sup>Max Planck Institute of Immunobiology and Epigenetics (MPI-IE), Freiburg, Germany. <sup>7</sup>Institute of Neuropathology, University Medical Center Göttingen, Göttingen, Germany. <sup>8</sup>VIB Center for Inflammation Research, Ghent, Belgium. <sup>9</sup>Department of Biomedical Molecular Biology, Ghent University, Ghent, Belgium. <sup>10</sup>Department of Stereotactic and Functional Neurosurgery, Medical Faculty, University of Freiburg, Freiburg, Germany. <sup>11</sup>Department of Neurosurgery, University Hospital Essen, Essen, Germany. <sup>12</sup>Department of Neurology, St. Josef Hospital, Ruhr University Bochum, Bochum, Germany. <sup>13</sup>DZNE, Berlin, Germany. <sup>14</sup>UK DRI, University of Edinburgh, Edinburgh, UK. <sup>15</sup>Signalling Research Centres BIOS and CIBSS, University of Freiburg, Freiburg, Germany. <sup>16</sup>Center for NeuroModulation, Faculty of Medicine, University of Freiburg, Freiburg, Germany. <sup>17</sup>These authors contributed equally: Takahiro Masuda, Roman Sankowski, Ori Staszewski. \*e-mail: marco.prinz@uniklinik-freiburg.de

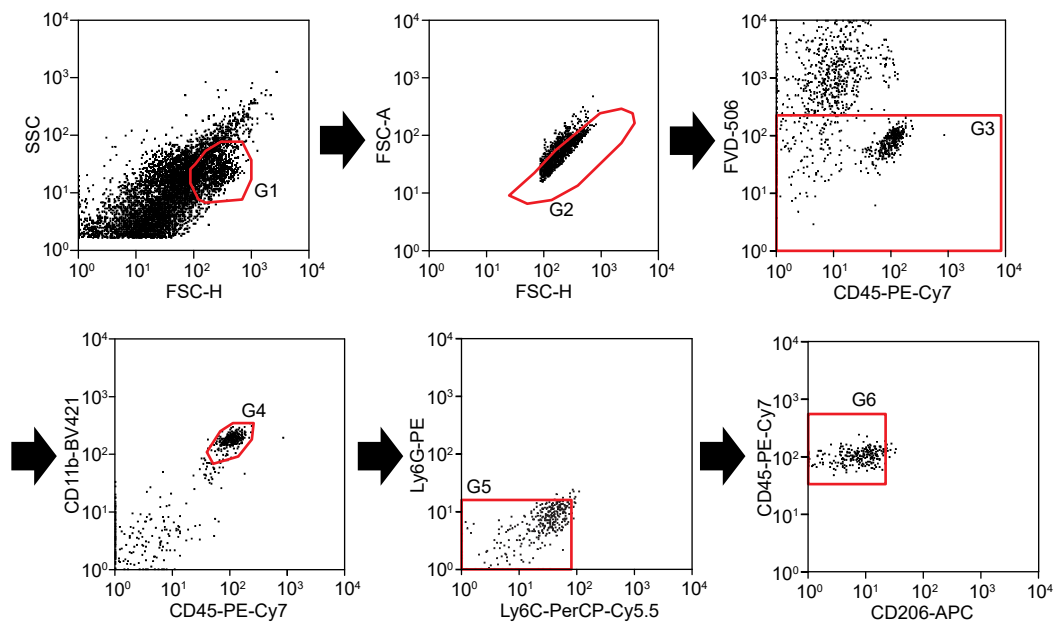

**Supplementary Figure 1:** FACS gating strategy for microglia isolation. CNS cells were gated for G1 and G2 (singlets), followed by being gated for living cell (G3, fixable viability dye), CD45<sup>int</sup>CD11b<sup>+</sup> (G4), Ly6C<sup>+</sup>Ly6G<sup>-</sup> (G5), and CD206<sup>-</sup> (G6).
